# Supplementary material
Source: PubMed Central journal article supplement (PMC5899455)
Supplement: pnas.1719586115.sd01.pdf [file pnas.1719586115.sd01.pdf]

**Supplemental Table 1 Single gene knockout or over-expression that increase the frequency and/or alter the histology of malignancy in p53<sup>-/-</sup> mice.**

| <b>Gene</b> | <b>Type of malignancy</b>              | <b>Ref.</b> |
|-------------|----------------------------------------|-------------|
| HSF1        | Sarcoma; Lung Adenocarcinoma           | (1)         |
| MSH2        | Lymphoma, Sarcoma                      | (2)         |
| BAX *       | Lymphoma                               | (3)         |
| FASL *      | Lymphoma                               | (4)         |
| FBXW7 *     | Lung, Liver and Ovarian Adenocarcinoma | (5)         |
| APC         | Renal Carcinoma                        | (6)         |
| K-Ras       | Colon and Lung Adenocarcinoma          | (7)         |
| MAD1,MAD2   | Lymphoma; Osteosarcoma                 | (8)         |
| SNF5        | Lymphoma                               | (9)         |
| E2F1        | Sarcoma                                | (10)        |
| NQO1        | Lymphoma; Lung Adenocarcinoma          | (11)        |
| Patched1    | Medulloblastoma                        | (12)        |
| SIRT1       | Sarcoma, Lymphoma, Teratoma, Carcinoma | (13)        |
| BRCA2       | Lymphoma                               | (14)        |
| P27 or p18  | Colon Carcinoma; and Sarcoma           | (15)        |
| TGFβ **     | Pancreatic Adenocarcinoma (reduced)    | (16)        |
| sPRDM16 **  | Acute Myeloid Leukemia                 | (17)        |

\*\*indicates transgenic over-expression of the gene; all others are effects of homozygous or heterozygous knockout. \*indicates experimentally determined presence of haploinsufficiency phenomenon.

### References

1. Min JN, Huang L, Zimonjic DB, Moskophidis D, & Mivechi NF (2007) Selective suppression of lymphomas by functional loss of Hsf1 in a p53-deficient mouse model for spontaneous tumors. *Oncogene* 26(35):5086-5097.
2. Cranston A, et al. (1997) Female embryonic lethality in mice nullizygous for both Msh2 and p53. *Nat Genet* 17(1):114-118.
3. Knudson CM, Johnson GM, Lin Y, & Korsmeyer SJ (2001) Bax accelerates tumorigenesis in p53-deficient mice. *Cancer research* 61(2):659-665.
4. Embree-Ku M & Boekelheide K (2002) FasL deficiency enhances the development of tumors in p53<sup>+/-</sup> mice. *Toxicol Pathol* 30(6):705-713.
5. Mao JH, et al. (2004) Fbxw7/Cdc4 is a p53-dependent, haploinsufficient tumour suppressor gene. *Nature* 432(7018):775-779.
6. Sansom OJ, Griffiths DFR, Reed KR, Winton DJ, & Clarke AR (2005) Apc deficiency predisposes to renal carcinoma in the mouse. *Oncogene* 24(55):8205-8210.
7. Wang Y, Zhang Z, Lubet RA, & You M (2006) A mouse model for tumor progression of lung cancer in ras and p53 transgenic mice. *Oncogene* 25(8):1277-1280.
8. Chi Y-H, Ward JM, Cheng LI, Yasunaga J, & Jeang K-T (2009) Spindle assembly checkpoint and p53 deficiencies cooperate for tumorigenesis in mice. *International journal of cancer. Journal international du cancer* 124(6):1483-1489.

9. DelBove J, *et al.* (2009) Inactivation of SNF5 cooperates with p53 loss to accelerate tumor formation in Snf5(+/-);p53(+/-) mice. *Molecular carcinogenesis* 48(12):1139-1148.
10. Palacios G, Talos F, Nemaierova A, Moll UM, & Petrenko O (2008) E2F1 plays a direct role in Rb stabilization and p53-independent tumor suppression. *Cell Cycle* 7(12):1776-1781.
11. Iskander K, Barrios RJ, & Jaiswal AK (2008) Disruption of NAD(P)H:quinone oxidoreductase 1 gene in mice leads to radiation-induced myeloproliferative disease. *Cancer research* 68(19):7915-7922.
12. Ayrault O, Zindy F, Rehg J, Sherr CJ, & Roussel MF (2009) Two tumor suppressors, p27(Kip1) and Patched-1, collaborate to prevent medulloblastoma. *Molecular cancer research : MCR* 7(1):33-40.
13. Wang RH, *et al.* (2008) Impaired DNA damage response, genome instability, and tumorigenesis in SIRT1 mutant mice. *Cancer cell* 14(4):312-323.
14. Park PG & Lee H (2008) Development of thymic lymphomas in mice disrupted of Brca2 allele in the thymus. *Experimental & molecular medicine* 40(3):339-344.
15. Damo LA, Snyder PW, & Franklin DS (2005) Tumorigenesis in p27/p53- and p18/p53-double null mice: functional collaboration between the pRb and p53 pathways. *Molecular carcinogenesis* 42(2):109-120.
16. Greten FR, *et al.* (2001) TGF alpha transgenic mice. A model of pancreatic cancer development. *Pancreatology : official journal of the International Association of Pancreatology (IAP) ... [et al.]* 1(4):363-368.
17. Shing DC, *et al.* (2007) Overexpression of sPRDM16 coupled with loss of p53 induces myeloid leukemias in mice. *J Clin Invest* 117(12):3696-3707.
